# Supplementary material
Source: publisher site journal article supplement (https://www.dovepress.com/get_supplementary_file.php?f=407759.docx)
Supplement: Supplementary file 1 [file get_supplementary_file.php]

**Supplementary Figures**


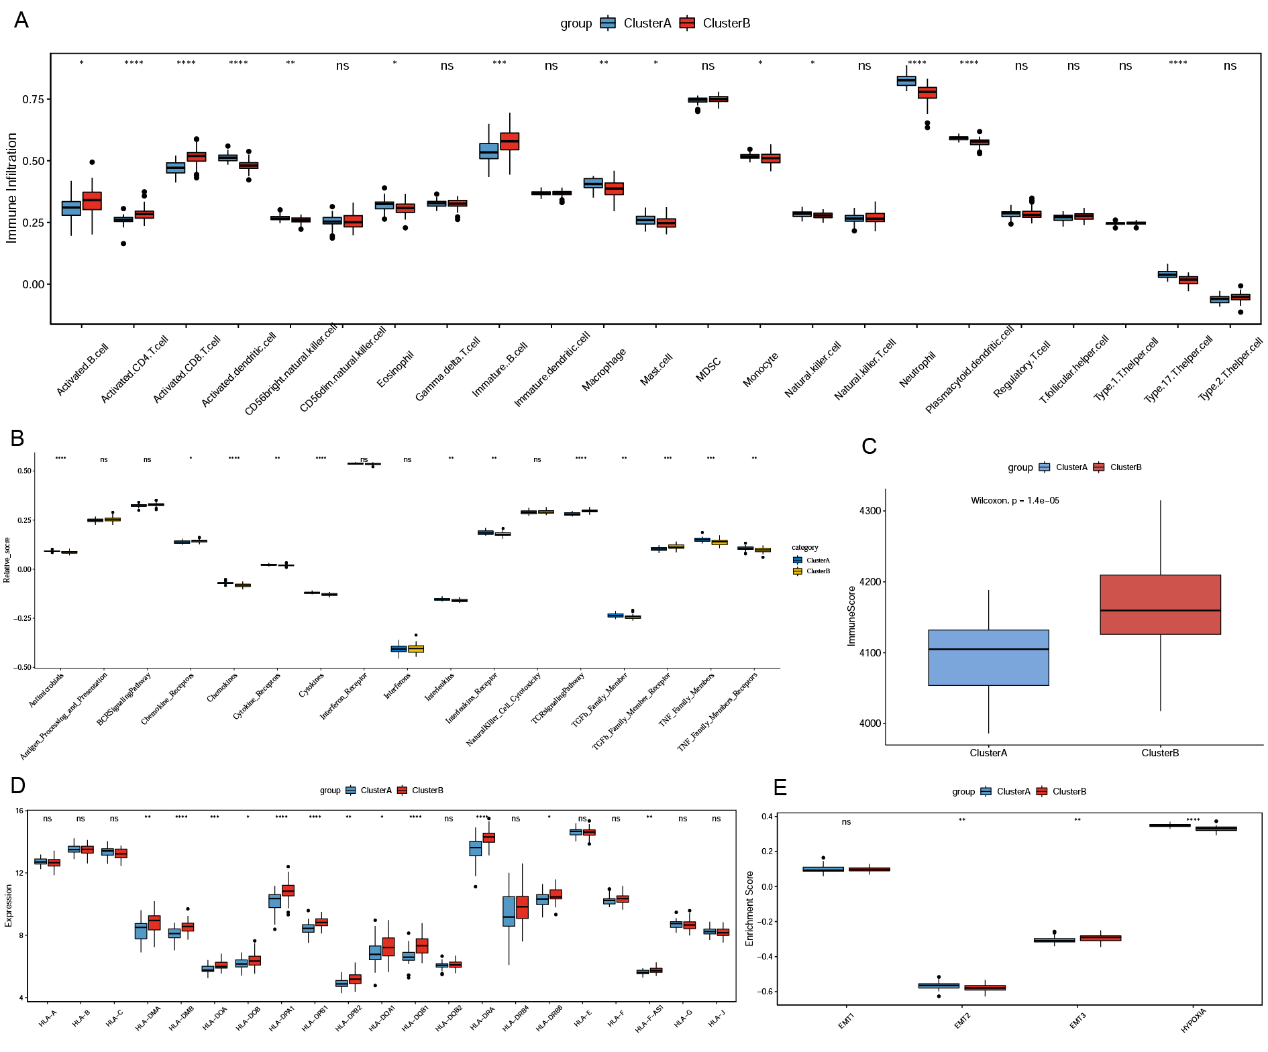


**Figure S1** Characteristics of IME cell infiltration between cluster A and cluster B group in validation sets.

(A) The abundance of each IME infiltrating cell in cluster A and cluster B group. (B) Difference activity of specific immune responses between cluster A and cluster B group. (C) Difference in immunescore between cluster A and cluster B group. (D) Difference in the HLA-related gene expression between cluster A and cluster B group. (E) Differences in EMT pathways and hypoxia condition between cluster A and cluster B group. * indicates *p* < 0.05; ** indicates *p* < 0.01; *** indicates *p* < 0.001; **** indicates *p* < 0.0001; ns indicates *p* > 0.05.

**
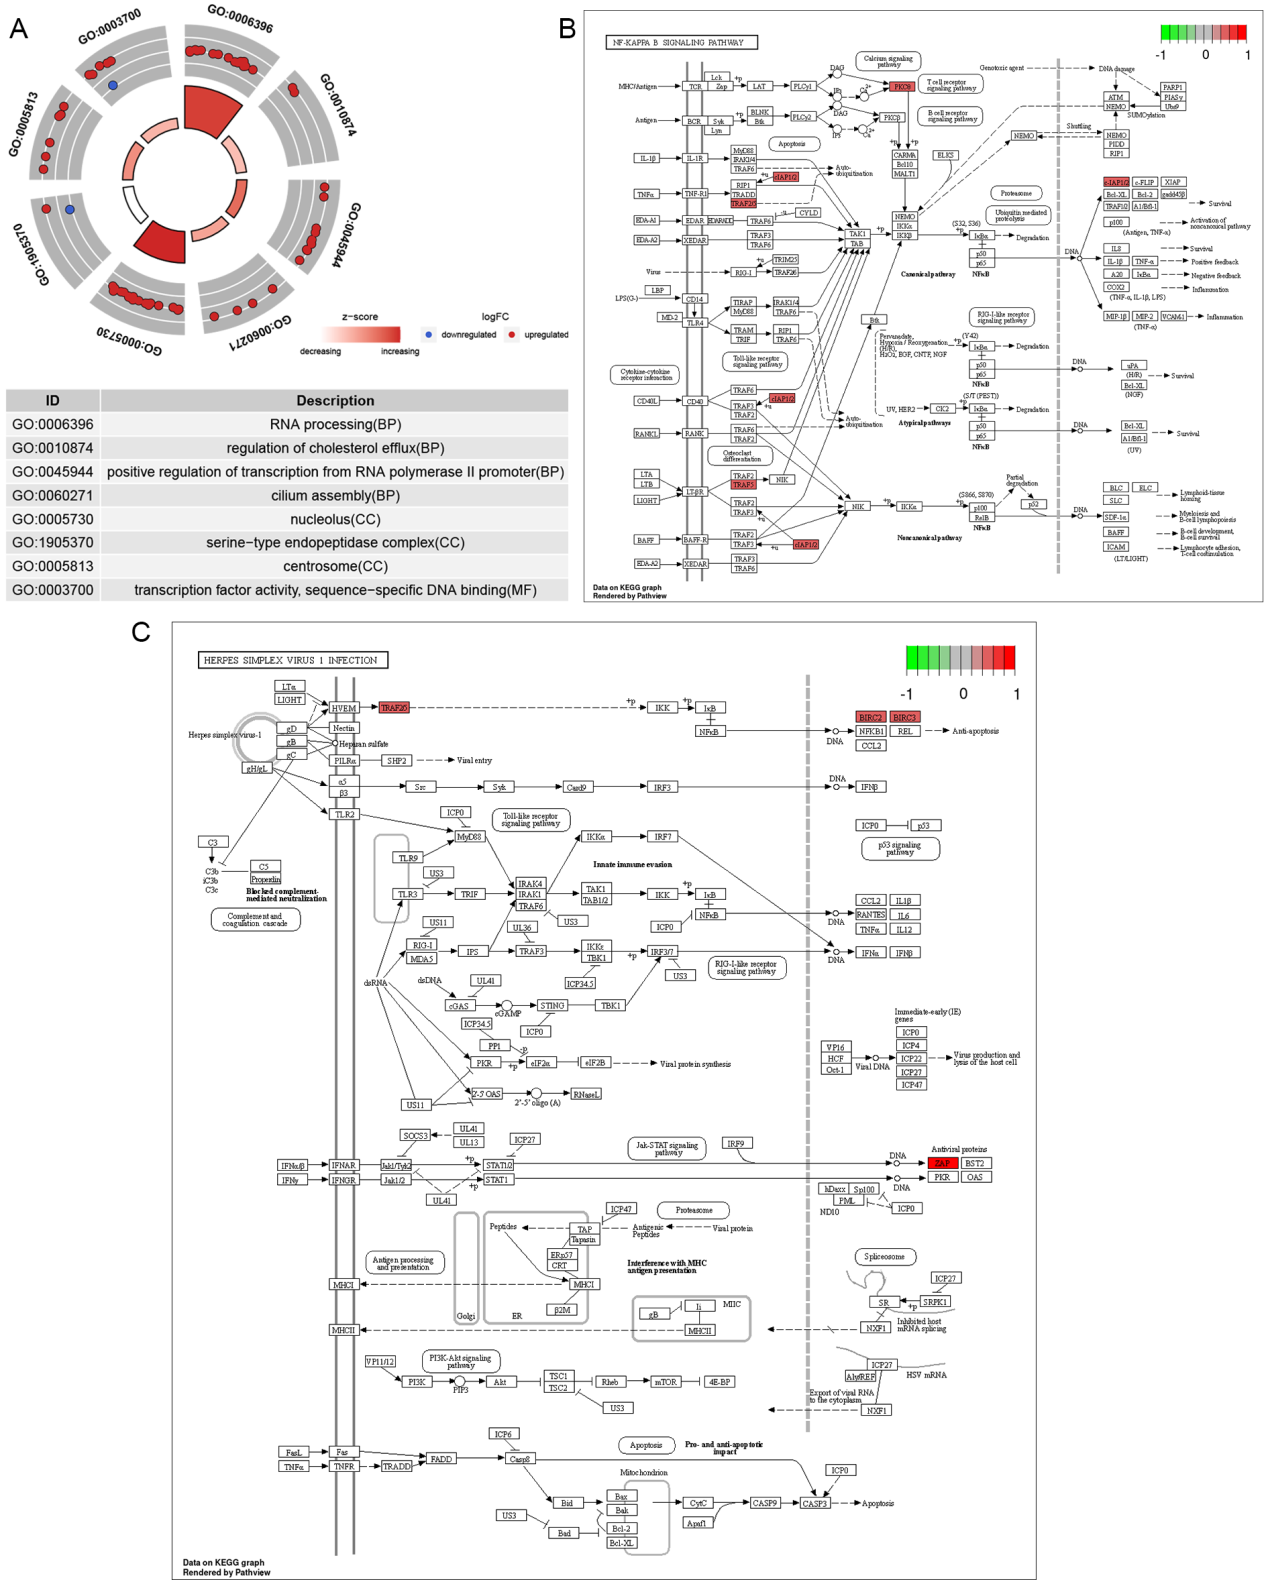
**

**Figure S2** GO and KEGG enrichment analysis of hub genes.

(A) GO enrichment analysis. (B) NF-kappa B signaling pathway. (C) Herpes simplex virus 1 infection.

**
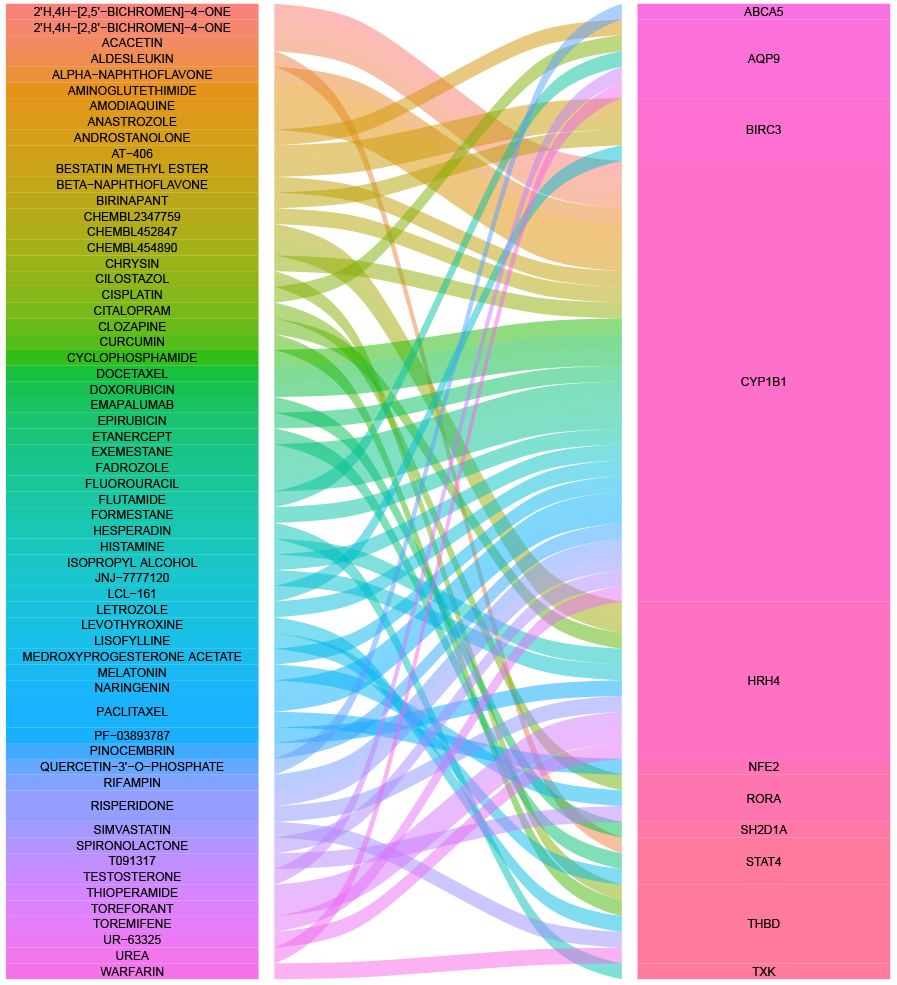
**

**Figure S3** The Sankey diagram revealed the correlation between the drugs and targets.

**Figure S4**

**
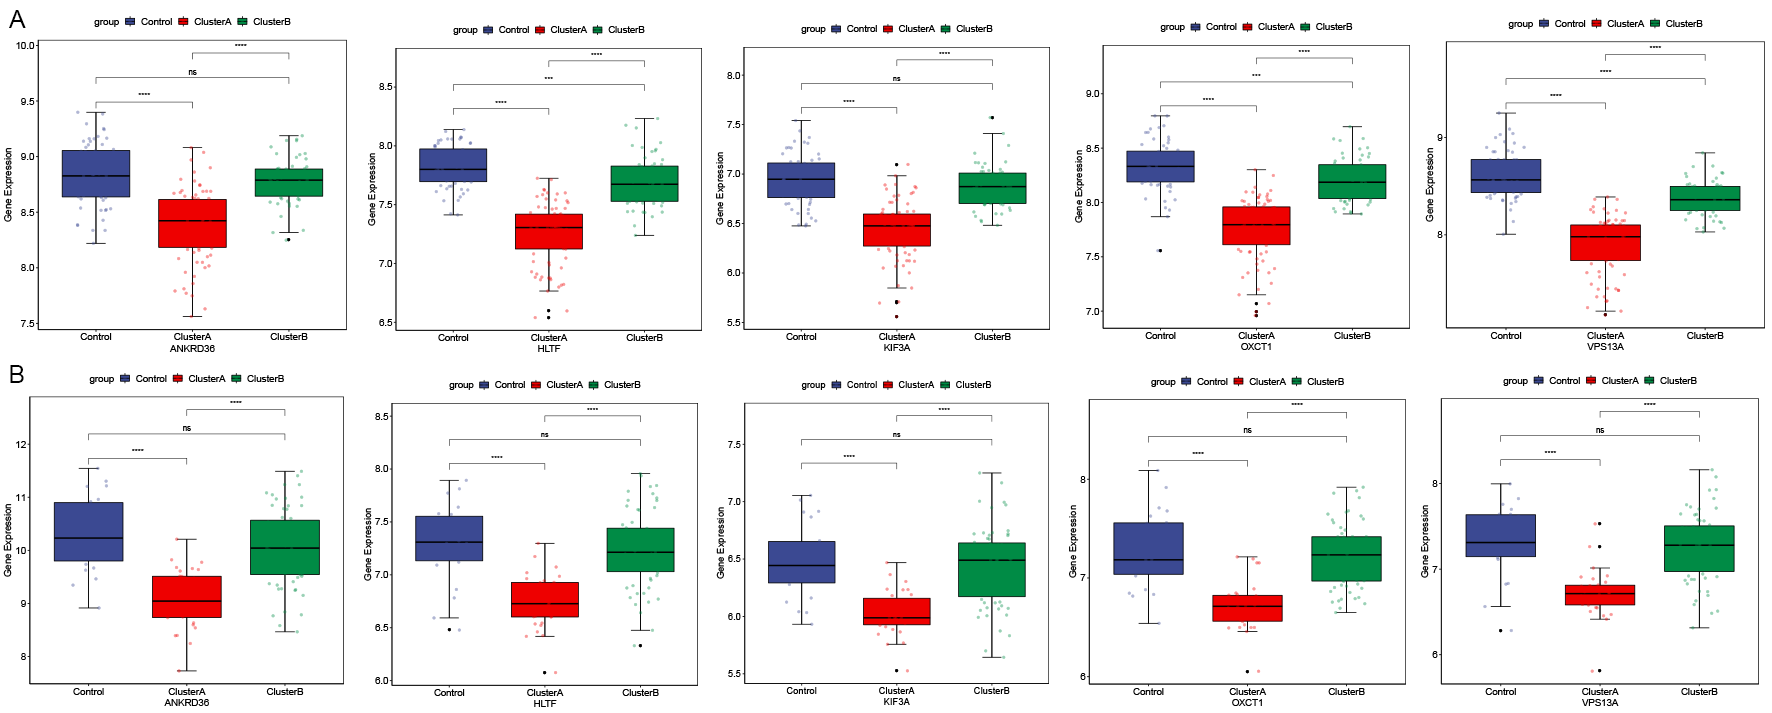
**

**Figure S4** Expression levels of 5 hub genes in training sets (A) and validation sets (B).

*** indicates *p* < 0.001; **** indicates *p* < 0.0001; ns indicates *p* > 0.05.

**Figure S5**

**
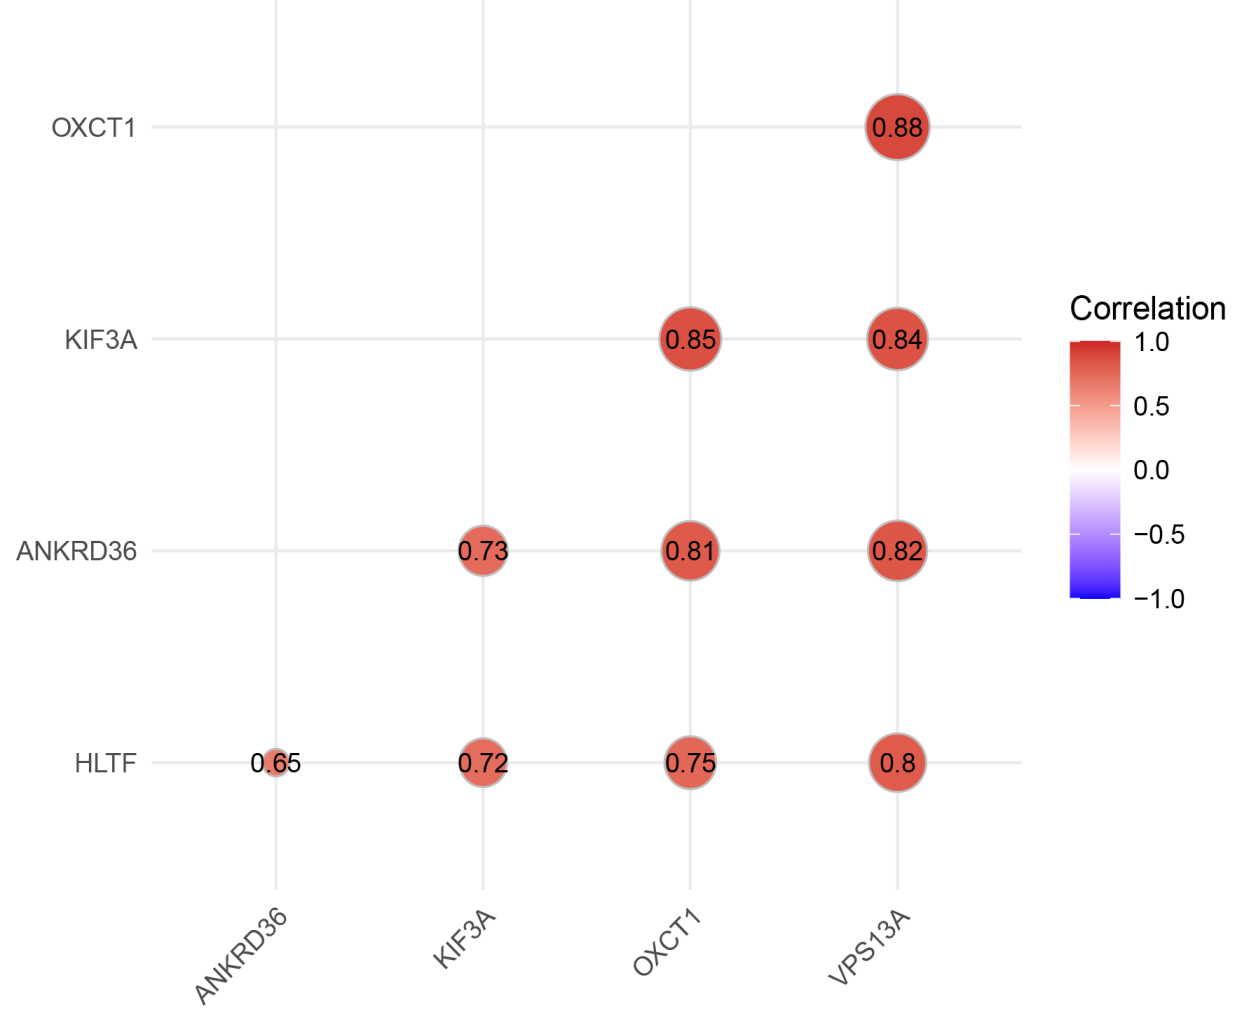
**

**Figure S5** Correlation analysis of 5 hub genes.
